# Supplementary material
Source: MDPI journal article supplement (https://www.mdpi.com/2414-4088/4/4/75)
Supplement: s1 [file supplementary file 4 modified.docx]

Article

Virtual Reality Nature Exposure and Test Anxiety

Alison O’Meara *, Marica Cassarino, Aaron Bolger and Annalisa Setti

Supplementary File 4: Participant Demographics

**Table S1.** Means and Standard Deviations for Participant Demographics.

| **Variable** | **High Anxiety** | | **Low Anxiety** | |
| --- | --- | --- | --- | --- |
|  | **M** | **SD** | **M** | **SD** |
| Age | 20.50 | 1.36 | 20.30 | 0.92 |
| Years in Higher Education | 2.55 | 0.89 | 2.75 | 0.71 |
| NCI | 59.15 | 22.12 | 47.75 | 24.33 |

1 *Note: ‘*Years of Ed’ is representative of how many years participants have attended third-level education. ‘NCI’ denotes Nature Connection Index.

**Table S2.** Percentages for Participant Demographics.

| **Variable** | **VR Prior** | | **Living** | |
| --- | --- | --- | --- | --- |
|  | **Yes** | **No** | **Urban** | **Rural** |
| High Anxiety | 45 | 55 | 70 | 30 |
| Low Anxiety | 50 | 50 | 40 | 60 |

2 *Note:* ‘VR Prior’ denotes whether participants had used VR before this study. ‘Living’ denotes whether participants live in a mostly urban or mostly rural environment.

| 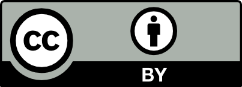 | © 2020 by the authors. Submitted for possible open access publication under the terms and conditions of the Creative Commons Attribution (CC BY) license (http://creativecommons.org/licenses/by/4.0/). |
| --- | --- |
